# Supplementary material for: Titin M-line insertion sequence 7 is required for proper cardiac function in mice
Source: Oxford University Press journal article supplement (doi:10.1242/jcs.258684), 2021-08-17
Supplement: jcs258684supp.pdf [file jcs258684supp.pdf]

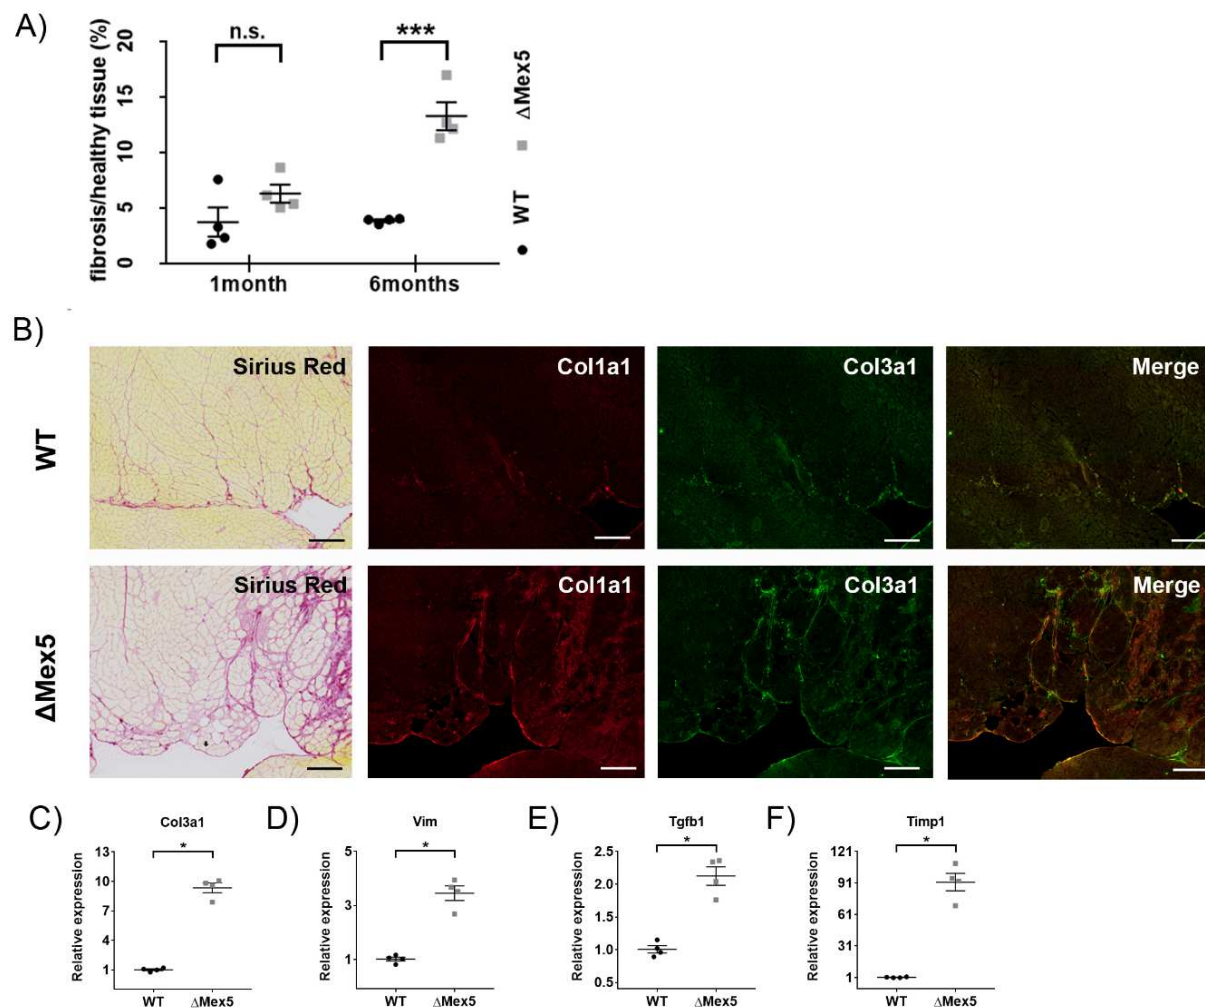

**Fig. S1.** **A)** Sirius red staining quantification at 1 and 6 months. Amount of staining is quantified in percentage of the total tissue section (mean  $\pm$  SEM). **B)** Histological sections of heart from Wild Type and  $\Delta$ Mex5 mice by Sirius Red at 4 months. Immunostaining of Collagen1a1 and Collagen 3a1 in Wild Type and  $\Delta$ Mex5 mice hearts at 4 months. Merge. Scale bars, 100  $\mu$ m. **C)**, **D)**, **E)**, **F)** qPCR results for fibrosis and heart damage makers (Co3a1, Vim, Tgfb1, Timp1) relative expression in Wild Type and  $\Delta$ Mex5 mice hearts at 4 months.

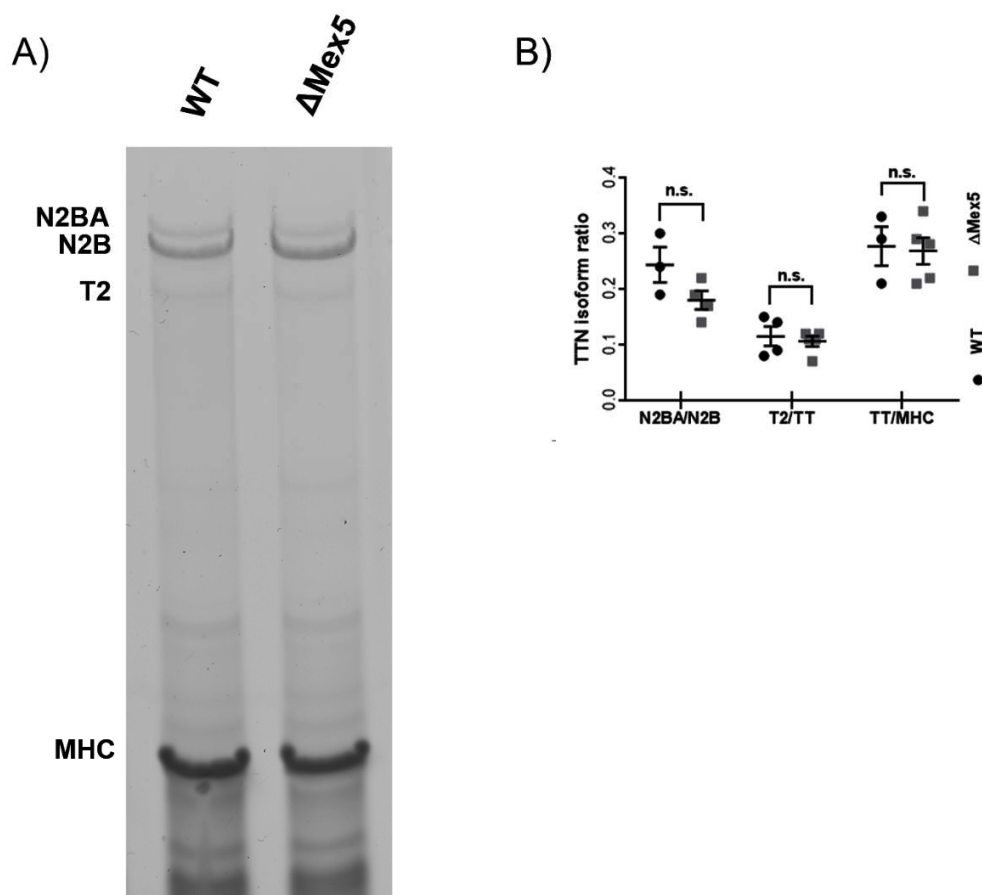

**Fig. S2.** **A)** Coomassie Blue gel staining on cardiac samples from Wild Type and  $\Delta$ Mex5 mice at 4 months. T2 = titin degradation products. **B)** Quantification of Coomassie Blue gel. Results are presented in means  $\pm$  SEM. Unpaired Mann-Whitney test were used to compare groups.

**Table S1. Echocardiographic parameters for WT and  $\Delta$ Mex5 mice at different ages.** Results are presented in means  $\pm$  SEM. Unpaired Mann-Whitney test were used to compare groups, \*  $P \leq 0.05$ , \*\*  $P \leq 0.01$ .

|                                                           |               | 2 months        | 4 months                             | 13 months                            |
|-----------------------------------------------------------|---------------|-----------------|--------------------------------------|--------------------------------------|
| <b>Mice number</b>                                        | WT            | n = 7           | n = 11                               | n = 6                                |
|                                                           | $\Delta$ Mex5 | n = 6           | n = 8                                | n = 7                                |
| <b>Heart rate (bpm)</b>                                   | WT            | 454 $\pm$ 19    | 472 $\pm$ 24                         | 484 $\pm$ 23                         |
|                                                           | $\Delta$ Mex5 | 469 $\pm$ 17    | 466 $\pm$ 23                         | 462 $\pm$ 34                         |
| <b>LV/body mass ratio</b>                                 | WT            | 4.8 $\pm$ 0.1   | 4.9 $\pm$ 0.2                        | 4.3 $\pm$ 0.3                        |
|                                                           | $\Delta$ Mex5 | 5.1 $\pm$ 0.2   | 5.4 $\pm$ 0.3                        | 5.0 $\pm$ 0.4                        |
| <b>Left Ventricle Internal Diameter end Diastole (mm)</b> | WT            | 4.47 $\pm$ 0.09 | 4.28 $\pm$ 0.09                      | 4.42 $\pm$ 0.13                      |
|                                                           | $\Delta$ Mex5 | 4.74 $\pm$ 0.11 | <b>4.83 <math>\pm</math> 0.22</b> ** | <b>5.23 <math>\pm</math> 0.17</b> ** |
| <b>Left Ventricle Internal Diameter end Systole (mm)</b>  | WT            | 3.59 $\pm$ 0.12 | 3.13 $\pm$ 0.12                      | 3.28 $\pm$ 0.16                      |
|                                                           | $\Delta$ Mex5 | 4.04 $\pm$ 0.18 | <b>3.88 <math>\pm</math> 0.26</b> ** | <b>4.24 <math>\pm</math> 0.21</b> ** |
| <b>LV posterior wall (mm)</b>                             | WT            | 0.59 $\pm$ 0.02 | 0.77 $\pm$ 0.03                      | 0.88 $\pm$ 0.06                      |
|                                                           | $\Delta$ Mex5 | 0.57 $\pm$ 0.03 | 0.83 $\pm$ 0.07                      | 0.75 $\pm$ 0.06                      |
| <b>Intra ventricular septum (mm)</b>                      | WT            | 0.80 $\pm$ 0.01 | 0.90 $\pm$ 0.04                      | 0.96 $\pm$ 0.03                      |
|                                                           | $\Delta$ Mex5 | 0.78 $\pm$ 0.03 | 1.00 $\pm$ 0.05                      | 0.88 $\pm$ 0.05                      |
| <b>Shortening Fraction (%)</b>                            | WT            | 20 $\pm$ 1      | 27 $\pm$ 2                           | 26 $\pm$ 1                           |
|                                                           | $\Delta$ Mex5 | 15 $\pm$ 2      | <b>20 <math>\pm</math> 3</b> *       | <b>19 <math>\pm</math> 2</b> *       |

**Table S2. Measures of pressure/volumes parameters for WT and  $\Delta$ Mex5 mice at 4 months.** Results are presented in means  $\pm$  SEM. **EDPVR** : End Diastolic Pressure Volume Relationship. Unpaired Mann-Whitney test were used to compare groups.

|                                                            |               |           |       |           |                                 |
|------------------------------------------------------------|---------------|-----------|-------|-----------|---------------------------------|
| <b>Mice number</b>                                         | WT            | n         | =     | 5         |                                 |
|                                                            | $\Delta$ Mex5 | n         | =     | 5         |                                 |
| <b>Heart rate (bpm)</b>                                    | WT            | 515       | $\pm$ | 24        |                                 |
|                                                            | $\Delta$ Mex5 | 470       | $\pm$ | 25        | $p = 0.421$                     |
| <b>End Systolic Elastance (mmHg/<math>\mu</math>L)</b>     | WT            | 4.08      | $\pm$ | 0.66      |                                 |
|                                                            | $\Delta$ Mex5 | 2.51      | $\pm$ | 0.67      | $p = 0.151$                     |
| <b>EDPVR – <math>\beta</math> (mmHg/<math>\mu</math>L)</b> | WT            | 0.03      | $\pm$ | 0.01      |                                 |
|                                                            | $\Delta$ Mex5 | 0.03      | $\pm$ | 0.00      | $p = 0.548$                     |
| <b>End Systolic Volume (<math>\mu</math>L)</b>             | WT            | 26        | $\pm$ | 4         |                                 |
|                                                            | $\Delta$ Mex5 | <b>56</b> | $\pm$ | <b>11</b> | <b><math>p = 0.032</math> *</b> |
| <b>End Diastolic Volume (<math>\mu</math>L)</b>            | WT            | 67        | $\pm$ | 5         |                                 |
|                                                            | $\Delta$ Mex5 | 91        | $\pm$ | 11        | $p = 0.095$                     |
| <b>Stroke Volume (<math>\mu</math>L)</b>                   | WT            | 40        | $\pm$ | 3         |                                 |
|                                                            | $\Delta$ Mex5 | 35        | $\pm$ | 1         | $p = 0.151$                     |
| <b>End Systolic Pressure (mmHg)</b>                        | WT            | 90        | $\pm$ | 4         |                                 |
|                                                            | $\Delta$ Mex5 | 89        | $\pm$ | 4         | $p = 0.841$                     |
| <b>End Diastolic Pressure (mmHg)</b>                       | WT            | 2         | $\pm$ | 0         |                                 |
|                                                            | $\Delta$ Mex5 | <b>5</b>  | $\pm$ | <b>1</b>  | <b><math>p = 0.032</math> *</b> |
| <b>dP/dtmin (mmHg/sec)</b>                                 | WT            | - 7733    | $\pm$ | 726       |                                 |
|                                                            | $\Delta$ Mex5 | - 6823    | $\pm$ | 554       | $p = 0.310$                     |
| <b>dP/dtmax (mmHg/sec)</b>                                 | WT            | 9155      | $\pm$ | 984       |                                 |
|                                                            | $\Delta$ Mex5 | 7903      | $\pm$ | 562       | $p = 0.310$                     |
| <b>Ejection Fraction (SV/EDV)</b>                          | WT            | 61        | $\pm$ | 3         |                                 |
|                                                            | $\Delta$ Mex5 | <b>41</b> | $\pm$ | <b>5</b>  | <b><math>p = 0.016</math> *</b> |

**Table S3. Top 25 up regulated genes identified in RNAseq analysis of  $\Delta$ Mex5 mice versus WT at 4 months.** Results are sorted by absolute value of log<sub>2</sub>FC.

| Gene name       | log <sub>2</sub> FC | pValue   | Mean WT | Mean $\Delta$ Mex5 |
|-----------------|---------------------|----------|---------|--------------------|
| <b>Spp1</b>     | 6.60                | 5.3E-128 | 6.65    | 2162.74            |
| <b>Cilp</b>     | 4.77                | 4.7E-278 | 109.77  | 3357.31            |
| <b>Ltbp2</b>    | 4.74                | 3.0E-174 | 68.03   | 2206.18            |
| <b>Gpnmb</b>    | 4.68                | 1.6E-97  | 19.98   | 764.57             |
| <b>Sprr1a</b>   | 4.33                | 1.4E-36  | 1.39    | 222.75             |
| <b>Tnc</b>      | 4.28                | 3.0E-33  | 38.66   | 4363.96            |
| <b>Timp1</b>    | 3.98                | 5.7E-52  | 24.25   | 625.54             |
| <b>Col12a1</b>  | 3.82                | 2.1E-60  | 50.08   | 989.43             |
| <b>Col8a2</b>   | 3.74                | 3.3E-40  | 10.59   | 247.08             |
| <b>Sfrp2</b>    | 3.62                | 2.1E-55  | 30.20   | 501.17             |
| <b>Thbs4</b>    | 3.61                | 3.8E-121 | 66.85   | 919.77             |
| <b>Ptn</b>      | 3.40                | 1.3E-35  | 17.60   | 290.91             |
| <b>Postn</b>    | 3.35                | 1.7E-21  | 414.51  | 12040.11           |
| <b>Mfap4</b>    | 3.31                | 4.0E-57  | 35.05   | 428.05             |
| <b>Piezo2</b>   | 3.27                | 2.9E-31  | 13.45   | 209.01             |
| <b>Col3a1</b>   | 3.22                | 1.7E-61  | 3682.59 | 40685.43           |
| <b>Col14a1</b>  | 3.20                | 9.5E-116 | 207.54  | 2081.22            |
| <b>Ctss</b>     | 3.19                | 3.0E-59  | 162.81  | 1773.00            |
| <b>Trem2</b>    | 3.16                | 2.9E-28  | 17.93   | 259.21             |
| <b>Atp6v0d2</b> | 3.15                | 2.7E-17  | 0.67    | 58.07              |
| <b>Apol7d</b>   | 3.15                | 5.2E-32  | 41.67   | 541.35             |
| <b>Lgals3</b>   | 3.10                | 7.0E-19  | 35.14   | 747.38             |
| <b>Mpeg1</b>    | 3.09                | 8.8E-23  | 143.04  | 2205.83            |
| <b>Dkk3</b>     | 3.01                | 2.8E-32  | 27.12   | 299.63             |
| <b>P4ha3</b>    | 2.96                | 1.6E-14  | 0.33    | 54.09              |

**Table S4. Top 25 down regulated genes identified in RNAseq analysis of  $\Delta$ Mex5 mice versus WT at 4 months.** Results are sorted by absolute value of log<sub>2</sub>FC.

| Gene name      | log <sub>2</sub> FC | pValue  | Mean WT | Mean $\Delta$ Mex5 |
|----------------|---------------------|---------|---------|--------------------|
| <b>Osbp16</b>  | -1.76               | 2.3E-21 | 515.48  | 140.16             |
| <b>Zfp619</b>  | -1.58               | 1.9E-08 | 103.02  | 28.98              |
| <b>Pde11a</b>  | -1.56               | 2.7E-04 | 21.94   | 1.85               |
| <b>Lgals4</b>  | -1.49               | 0.001   | 561.89  | 85.54              |
| <b>Mylk4</b>   | -1.42               | 1.6E-21 | 2880.01 | 1036.29            |
| <b>Rtn4r</b>   | -1.40               | 7.2E-06 | 75.68   | 23.33              |
| <b>Ano5</b>    | -1.39               | 1.4E-05 | 80.70   | 24.81              |
| <b>Sv2c</b>    | -1.39               | 2.5E-04 | 38.48   | 10.09              |
| <b>Pah</b>     | -1.35               | 0.002   | 19.93   | 3.24               |
| <b>Kcnv2</b>   | -1.32               | 1.3E-07 | 279.05  | 100.09             |
| <b>mt-Ts1</b>  | -1.29               | 0.002   | 333.81  | 84.07              |
| <b>Pop4</b>    | -1.26               | 1.6E-07 | 138.11  | 52.85              |
| <b>Wnk2</b>    | -1.24               | 3.6E-21 | 1894.07 | 782.52             |
| <b>Cln1</b>    | -1.18               | 5.5E-10 | 256.20  | 106.65             |
| <b>Whrn</b>    | -1.16               | 8.3E-10 | 398.94  | 168.86             |
| <b>Pzp</b>     | -1.16               | 0.006   | 32.33   | 9.46               |
| <b>Celsr3</b>  | -1.16               | 5.7E-06 | 107.32  | 43.91              |
| <b>Clec18a</b> | -1.13               | 0.008   | 34.03   | 10.35              |
| <b>Lrrc52</b>  | -1.11               | 0.001   | 73.90   | 28.82              |
| <b>mt-Ti</b>   | -1.09               | 5.0E-23 | 4813.41 | 2232.44            |
| <b>Ctla4</b>   | -1.08               | 0.002   | 59.32   | 23.36              |
| <b>Apob</b>    | -1.08               | 0.015   | 22.66   | 1.83               |
| <b>Lmtd1</b>   | -1.06               | 0.015   | 26.52   | 8.54               |
| <b>Gal3st3</b> | -1.05               | 8.7E-06 | 236.70  | 106.10             |
| <b>mt-Tm</b>   | -1.04               | 5.9E-07 | 2037.16 | 939.00             |

**Table S5. Top 25 up regulated GO biological processes identified in RNAseq analysis of ΔMex5 mice versus WT at 4 months.**

| <b>Gene Set ID</b>                                          | <b>set Size</b> | <b>NES</b> | <b>pValue adjusted</b> |
|-------------------------------------------------------------|-----------------|------------|------------------------|
| GO_EXTRACELLULAR_STRUCTURE_ORGANIZATION                     | 319             | 2.087      | 2.40E-34               |
| GO_LEUKOCYTE_MIGRATION                                      | 330             | 2.014      | 1.24E-28               |
| GO_REGULATION_OF_CELL_ACTIVATION                            | 437             | 1.890      | 1.69E-25               |
| GO_MYELOID_LEUKOCYTE_MEDIATED_IMMUNITY                      | 451             | 1.835      | 2.95E-22               |
| GO_LEUKOCYTE_DIFFERENTIATION                                | 401             | 1.856      | 3.71E-22               |
| GO_ADAPTIVE_IMMUNE_RESPONSE                                 | 273             | 1.966      | 3.07E-20               |
| GO_POSITIVE_REGULATION_OF_IMMUNE_RESPONSE                   | 480             | 1.773      | 2.07E-19               |
| GO_WOUND_HEALING                                            | 412             | 1.800      | 2.07E-19               |
| GO_POSITIVE_REGULATION_OF_CYTOKINE_PRODUCT<br>ION           | 356             | 1.844      | 5.70E-19               |
| GO_T_CELL_ACTIVATION                                        | 354             | 1.834      | 8.88E-19               |
| GO_POSITIVE_REGULATION_OF_CELL_ACTIVATION                   | 264             | 1.938      | 2.31E-18               |
| GO_POSITIVE_REGULATION_OF_CELLULAR_COMPON<br>ENT_MOVEMENT   | 476             | 1.740      | 5.31E-18               |
| GO_CELL_CHEMOTAXIS                                          | 226             | 1.956      | 2.30E-17               |
| GO_MYELOID_LEUKOCYTE_MIGRATION                              | 158             | 2.090      | 2.30E-17               |
| GO_PHAGOCYTOSIS                                             | 227             | 1.960      | 4.18E-17               |
| GO_REGULATION_OF_INFLAMMATORY_RESPONSE                      | 275             | 1.894      | 4.25E-17               |
| GO_POSITIVE_REGULATION_OF_RESPONSE_TO_EXTE<br>RNAL_STIMULUS | 397             | 1.767      | 4.95E-17               |
| GO_POSITIVE_REGULATION_OF_CELL_ADHESION                     | 330             | 1.823      | 9.15E-17               |
| GO_REGULATION_OF_LYMPHOCYTE_ACTIVATION                      | 333             | 1.821      | 1.86E-16               |
| GO_SISTER_CHROMATID_SEGREGATION                             | 169             | 2.028      | 3.91E-16               |
| GO_LEUKOCYTE_CHEMOTAXIS                                     | 168             | 2.019      | 1.08E-15               |
| GO_TAXIS                                                    | 485             | 1.701      | 1.47E-15               |
| GO_REGULATION_OF_LEUKOCYTE_MIGRATION                        | 167             | 2.015      | 1.50E-15               |
| GO_MITOTIC_SISTER_CHROMATID_SEGREGATION                     | 146             | 2.063      | 1.81E-15               |
| GO_RESPONSE_TO_BACTERIUM                                    | 410             | 1.726      | 2.76E-15               |

**Table S6. Top 25 down regulated GO biological processes identified in RNAseq analysis of ΔMex5 mice versus WT at 4 months.**

| Gene Set ID                                                   | set Size | NES    | pValue adjusted |
|---------------------------------------------------------------|----------|--------|-----------------|
| GO_MITOCHONDRIAL_RESPIRATORY_CHAIN_COMPLEX_ASSEMBLY           | 99       | -3.478 | 1.77E-22        |
| GO_RESPIRATORY_ELECTRON_TRANSPORT_CHAIN                       | 110      | -3.234 | 1.15E-20        |
| GO_AEROBIC_RESPIRATION                                        | 82       | -3.338 | 5.52E-19        |
| GO_MITOCHONDRIAL_ELECTRON_TRANSPORT_NADH_TO_UBIQUINONE        | 52       | -3.340 | 6.52E-19        |
| GO_ATP_SYNTHESIS_COUPLED_ELECTRON_TRANSPORT                   | 92       | -3.376 | 2.84E-18        |
| GO_NADH_DEHYDROGENASE_COMPLEX_ASSEMBLY                        | 63       | -3.317 | 8.40E-18        |
| GO_MITOCHONDRIAL_TRANSLATIONAL_TERMINATION                    | 89       | -3.233 | 8.09E-17        |
| GO_TRANSLATIONAL_TERMINATION                                  | 102      | -3.126 | 3.07E-15        |
| GO_TRICARBOXYLIC_ACID_CYCLE                                   | 32       | -3.001 | 5.23E-11        |
| GO_INNER_MITOCHONDRIAL_MEMBRANE_ORGANIZATION                  | 51       | -2.865 | 1.50E-10        |
| GO_MITOCHONDRIAL_TRANSMEMBRANE_TRANSPORT                      | 96       | -2.680 | 5.44E-10        |
| GO_FATTY_ACID_BETA_OXIDATION                                  | 64       | -2.747 | 3.49E-09        |
| GO_MONOCARBOXYLIC_ACID_CATABOLIC_PROCESS                      | 108      | -2.469 | 2.76E-08        |
| GO_CRISTAE_FORMATION                                          | 34       | -2.803 | 4.41E-08        |
| GO_ATP_SYNTHESIS_COUPLED_PROTON_TRANSPORT                     | 25       | -2.678 | 1.55E-07        |
| GO_FATTY_ACID_CATABOLIC_PROCESS                               | 93       | -2.421 | 2.94E-07        |
| GO_2_OXOGLUTARATE_METABOLIC_PROCESS                           | 14       | -2.475 | 1.06E-06        |
| GO_CELLULAR_AMINO_ACID_CATABOLIC_PROCESS                      | 91       | -2.279 | 4.26E-06        |
| GO_FATTY_ACID_BETA_OXIDATION_USING_ACYL_COA_DEHYDROGENASE     | 11       | -2.383 | 5.31E-06        |
| GO_PROTEIN_TRANSMEMBRANE_IMPORT_INTO_INTRACELLULAR_ORGANELLE  | 33       | -2.521 | 1.49E-05        |
| GO_LIPID_OXIDATION                                            | 92       | -2.199 | 1.89E-05        |
| GO_THIOESTER_METABOLIC_PROCESS                                | 82       | -2.209 | 2.03E-05        |
| GO_MITOCHONDRIAL_RNA_METABOLIC_PROCESS                        | 43       | -2.407 | 2.39E-05        |
| GO_MITOCHONDRIAL_ELECTRON_TRANSPORT_UBIQUINOL_TO_CYTOCHROME_C | 13       | -2.336 | 2.81E-05        |
| GO_AEROBIC_ELECTRON_TRANSPORT_CHAIN                           | 20       | -2.410 | 2.85E-05        |



**Table S7. M10 Binding partner values obtained by RNAseq analysis of  $\Delta$ Mex5 mice versus WT at 4 months.**

| Gene name    | Protein                             | log2FC | pValue         | Mean WT  | Mean $\Delta$ Mex5 |
|--------------|-------------------------------------|--------|----------------|----------|--------------------|
| Capn3        | Calpain3                            | 0.19   | 0.636          | 92.67    | 107.19             |
| <b>Cmya5</b> | Cardiomyopathy associated protein 5 | -0.58  | <b>4.0E-04</b> | 37053.21 | 24367.82           |
| <b>Obscn</b> | Obscurin                            | -0.44  | <b>0.001</b>   | 44418.89 | 32389.48           |
| <b>Obsl1</b> | Obscurin like-1                     | -0.27  | <b>0.028</b>   | 2143.24  | 1770.10            |
| Synm         | alpha-synemin                       | 0.32   | 0.112          | 285.49   | 360.00             |

**Table S8. Genes with a role in Ca<sup>2+</sup>-signaling. Values obtained by RNAseq analysis of  $\Delta$ Mex5 mice versus WT at 4 months.**

| Gene name     | Protein                  | log2FC | pValue         | Mean WT   | Mean $\Delta$ Mex5 |
|---------------|--------------------------|--------|----------------|-----------|--------------------|
| <b>Atp2a2</b> | Serca2                   | -0.58  | <b>1.6E-06</b> | 266940.42 | 177612.55          |
| Cacna1c       | Dihydropyridine receptor | -0.25  | 0.057          | 10077.29  | 8462.90            |
| <b>Jph2</b>   | Junctophilin 2           | -0.42  | <b>0.001</b>   | 7420.52   | 5525.69            |
| <b>Pln</b>    | Phospholamban            | -0.45  | <b>0.015</b>   | 74465.34  | 53850.42           |
| <b>Ryr2</b>   | Ryanodine receptor 2     | -0.42  | <b>2.5E-05</b> | 95617.29  | 71024.99           |

**Table S9. Antibodies used for Immunohistochemistry and Western Blots.**

| <b>Primary antibody target</b>     | <b>Source</b>            | <b>Experiment</b> | <b>Dilution</b> |
|------------------------------------|--------------------------|-------------------|-----------------|
| <b><math>\alpha</math>-actinin</b> | sigma A7811              | IHF               | 1:20            |
| <b>Cmya5</b>                       | abcam ab75351            | IHF               | 1:25            |
| <b>Cmya5</b>                       | NovusBio NBP1-77117      | WB                | 1:1000          |
| <b>Collagen1</b>                   | abcam ab6308             | IHF               | 1:100           |
| <b>Collagen3</b>                   | abcam ab7778             | IHF               | 1:100           |
| <b>Dhpr</b>                        | abcam ab58552            | IHF               | 1:50            |
| <b>Dhpr</b>                        | Alomone ACC-003          | WB                | 1:500           |
| <b>GAPDH</b>                       | Sigma PLA0302            | WB                | 1:2000          |
| <b>Junctophilin-2</b>              | Santa-Cruz sc-377086     | WB                | 1:1000          |
| <b>Obscurin</b>                    | Atlas antibody HPA019497 | IHF               | 1:100           |
| <b>Obscurin</b>                    | Milipore ABT160          | WB                | 1:1000          |
| <b>Ryr2</b>                        | abclonal A0298           | IHF<br>WB         | 1:200<br>1:500  |
| <b>Serca2</b>                      | Abclonal A1097           | WB                | 1:1000          |
| <b>Synemin</b>                     | Atlas antibody HPA040066 | IHF<br>WB         | 1:50<br>1:500   |
| <b>Titin is7</b>                   | (Charton et al., 2016)   | IHF<br>WB         | 1:2<br>1:2000   |
| <b>Titin M8M9</b>                  | Myomedix                 | IHF<br>WB         | 1:75<br>1:2000  |
| <b>Titin M10</b>                   | (Hackman et al., 2008)   | IHF<br>WB         | 1:75<br>1:2000  |
| <b>Titin Z1Z2</b>                  | Abnova H00007273-M06     | WB                | 1:2000          |

**Table S10. Taqman probes used for qRT-PCR.**

| <b>Gene</b>    | <b>Taqman probe</b> |
|----------------|---------------------|
| <b>Atp2a2</b>  | Mm01201431_m1       |
| <b>Cacna1c</b> | Mm01188822_m1       |
| <b>Cmya5</b>   | Mm01282681.m1       |
| <b>Colla1</b>  | Mm00801666_g1       |
| <b>Col3a1</b>  | Mm00802300_m1       |
| <b>Fn1</b>     | Mm01256744_m1       |
| <b>Jph2</b>    | Mm00517621_m1       |
| <b>Myh6</b>    | Mm00440359_m1       |
| <b>Myh7</b>    | Mm01319006_g1       |
| <b>Nppa</b>    | Mm01255747_g1       |
| <b>Obscn</b>   | Mm01341542_g1       |
| <b>Ryr2</b>    | Mm00465877_m1       |
| <b>Sym</b>     | Mm00809202_s1       |
| <b>TgfB1</b>   | Mm01178820_m1       |
| <b>Timp1</b>   | Mm01341361_m1       |
| <b>Ttn</b>     | Mm00621005_m1       |
| <b>Vim</b>     | Mm01333430_m1       |

## REFERENCES

- CHARTON, K., SUEL, L., HENRIQUES, S. F., MOUSSU, J. P., BOVOLenta, M., TAILLEPIERRE, M., BECKER, C., LIPSON, K. & RICHARD, I. 2016. Exploiting the CRISPR/Cas9 system to study alternative splicing in vivo: application to titin. *Hum Mol Genet*, 25, 4518-4532.
- HACKMAN, P., MARCHAND, S., SARPARANTA, J., VIHOLA, A., PENISSON-BESNIER, I., EYMARD, B., PARDAL-FERNANDEZ, J. M., HAMMOUDA EL, H., RICHARD, I., ILLA, I. & UDD, B. 2008. Truncating mutations in C-terminal titin may cause more severe tibial muscular dystrophy (TMD). *Neuromuscul Disord*, 18, 922-8.
